# Supplementary material for: {NiII8LnIII6} (Ln = Gd, Dy) rod-like nano-sized heteronuclear coordination clusters with a double carbonate bridge skeleton and remarkable MCE behaviour
Source: Royal Society of Chemistry journal article supplement (doi:10.1039/c6dt00859c), 2016-01-01
Supplement: c6dt00859c1.pdf [file c6dt00859c1.pdf]

## Electronic Supplementary Information

### **{Ni<sup>II</sup><sub>8</sub>Ln<sup>III</sup><sub>6</sub>} (Ln=Gd, Dy) rod-like nano-sized heteronuclear coordination cluster with a double carbonate bridge skeleton and remarkable MCE behaviour**

**Eliana Guarda<sup>a</sup>, Katharina Bader<sup>b</sup>, Joris van Slageren<sup>b</sup>, Pablo Alborés<sup>a\*</sup>**

<sup>a</sup> Departamento de Química Inorgánica, Analítica y Química Física/ INQUIMAE (CONICET), Facultad de Ciencias Exactas y Naturales Universidad de Buenos Aires, Pabellón 2, Ciudad Universitaria, C1428EHA Buenos Aires, Argentina.;

[Tel:+54\(0\)1145763380](tel:+5401145763380); E-mail: [albores@.qi.fcen.uba.ar](mailto:albores@qi.fcen.uba.ar)

<sup>b</sup> Institut für Physikalische Chemie, Universität Stuttgart, Pfaffenwaldring 55, D-70569, Stuttgart, Germany.

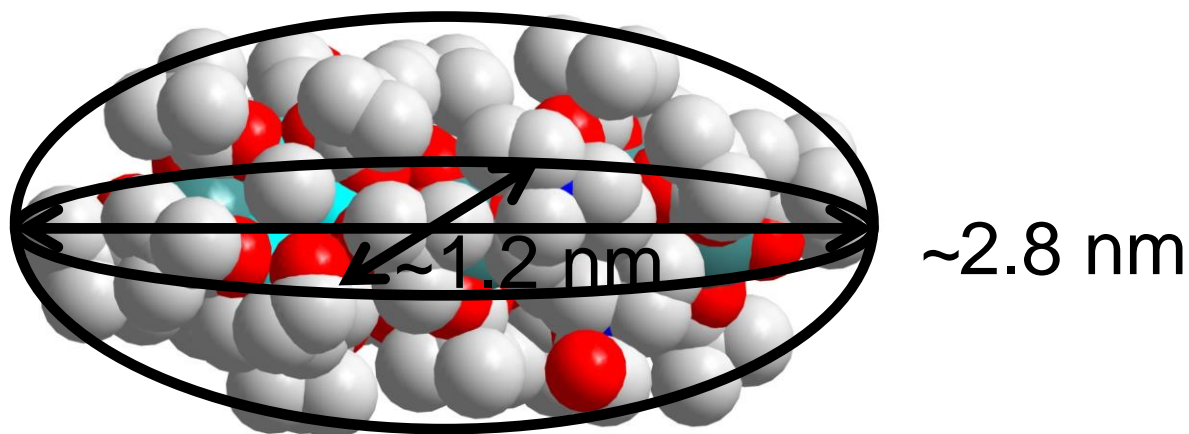

**Figure ESI1.** Space filling representation of  $\text{Ni}_8\text{Dy}_6$  complexes showing their rod-like overall shape.

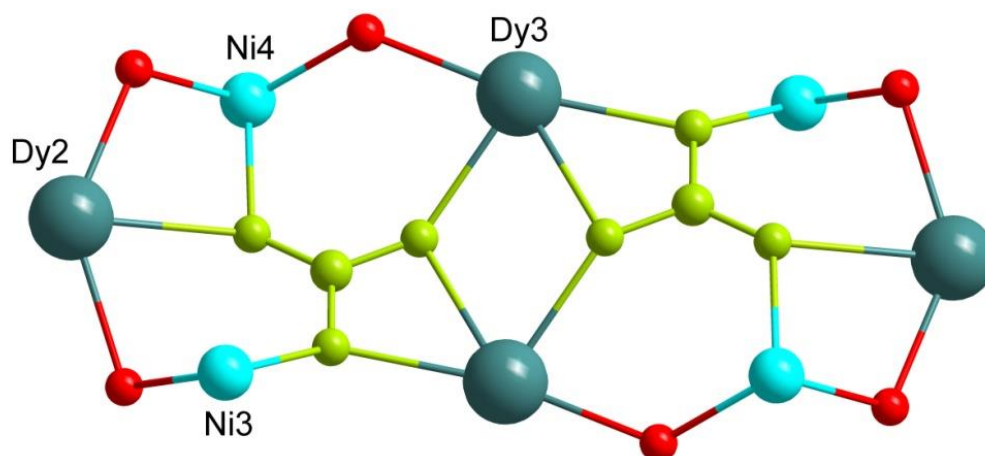

**Figure ESI2.** Molecular representation of the central double  $\mu_5$ -carbonate bridged octanuclear  $\{\text{Ni}_4\text{Dy}_4\}$  moiety. Carbonate bridges are green highlighted.

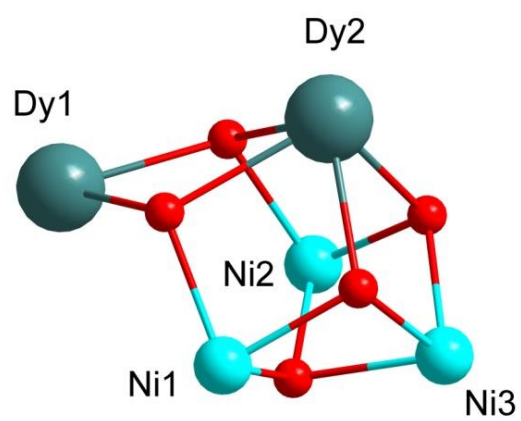

**Figure ESI3.** Molecular representation of the opened cubane Ni<sub>3</sub>Dy units located at both sides of the central octanuclear {Ni<sub>4</sub>Dy<sub>4</sub>} moiety.

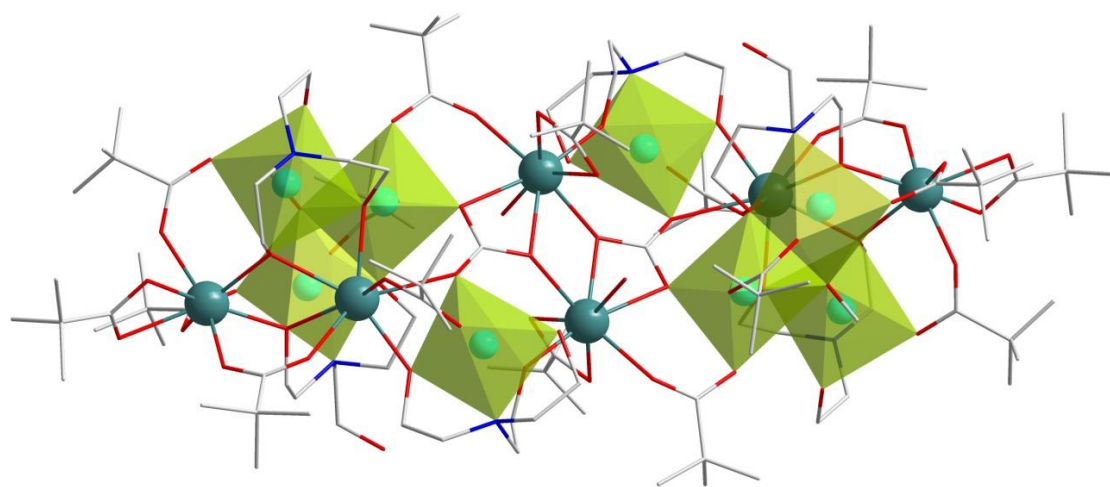

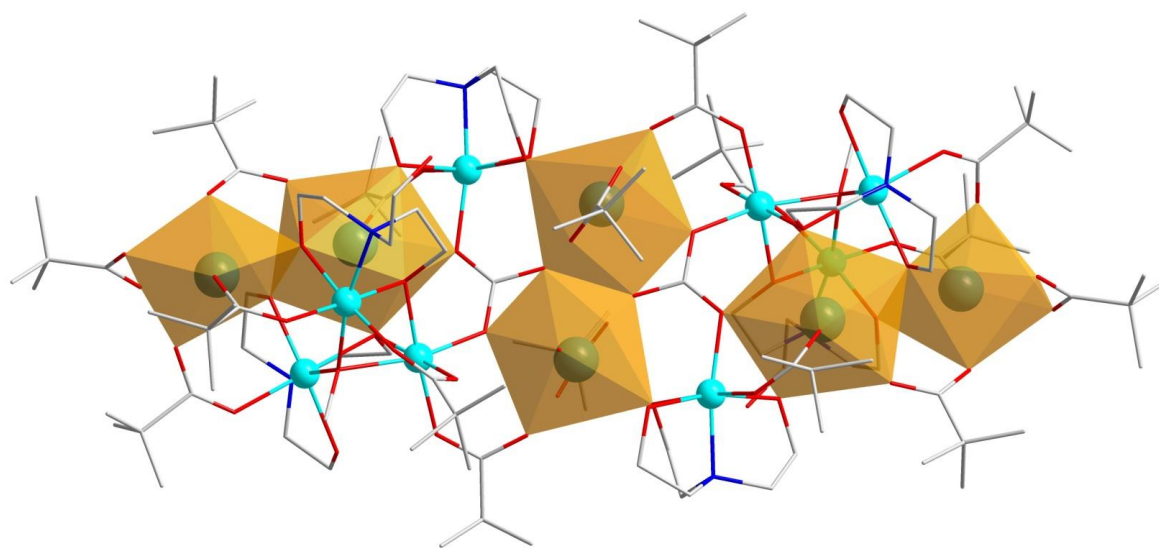

**Figure ESI4.** Polyhedra representation of coordination environment of all Ni(II) sites (top) and all Dy(III) sites (bottom).

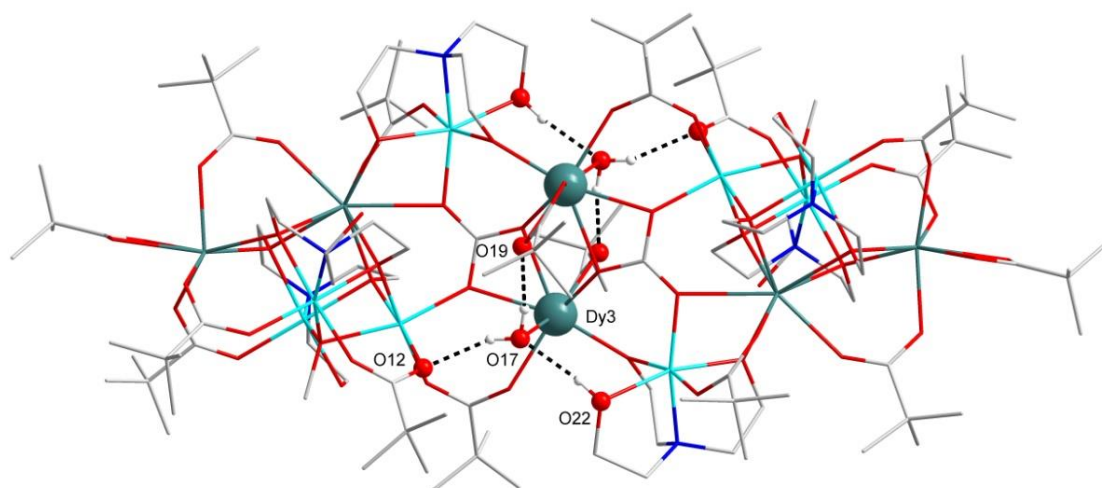

**Figure ESI5.** Intra-molecular H-bond interactions present in complex Ni<sub>8</sub>Dy<sub>6</sub>.

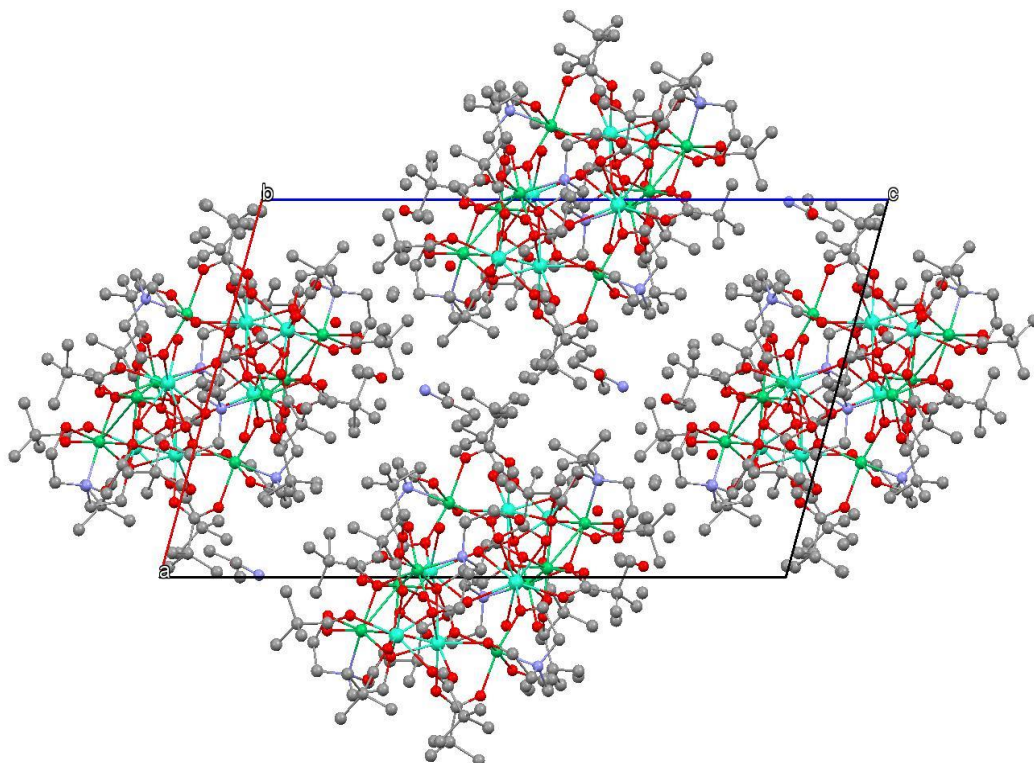

**Figure ESI6.** Unit cell crystal packing of Ni<sub>8</sub>Dy<sub>6</sub>. View along monoclinic *b*-axis.

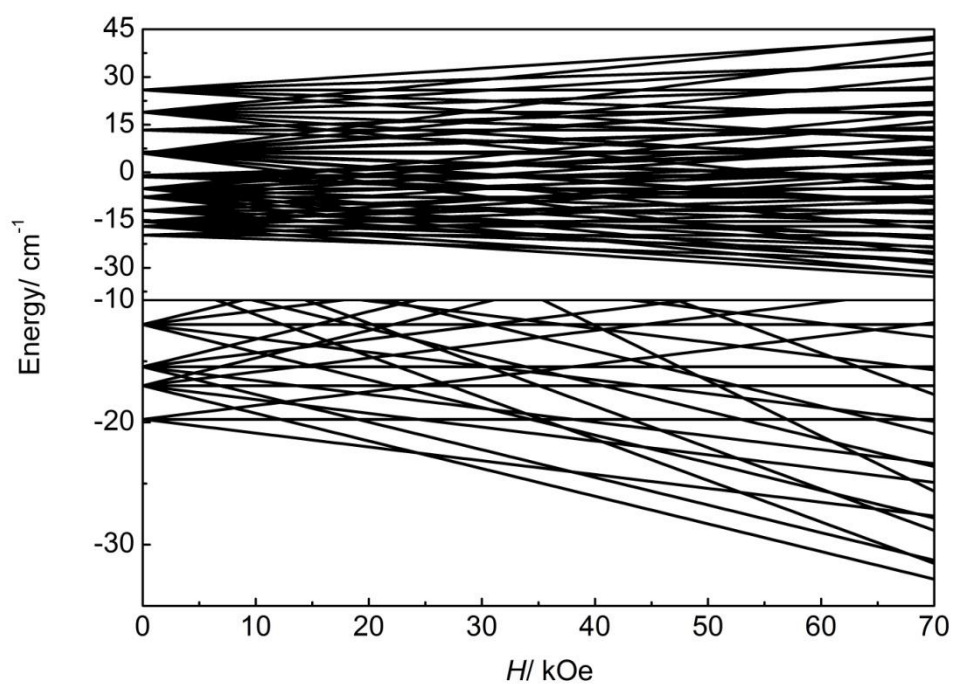

**Figure ESI7.** Spin ladder energies arising from Ni<sub>4</sub> model fitting (see text).

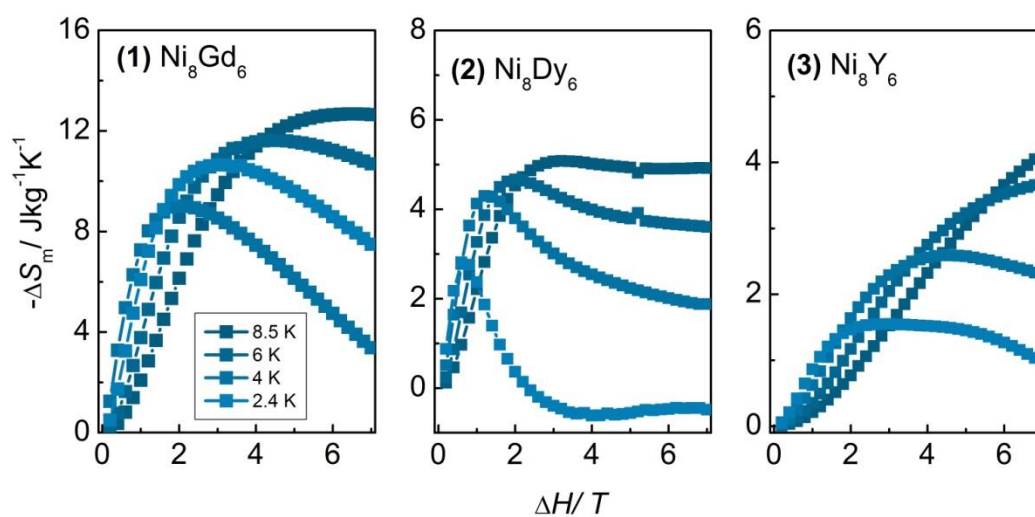

**Figure ESI8.** Magnetic entropy change field dependence at different fixed temperatures of complexes **1-3**, as evaluated from magnetization data.

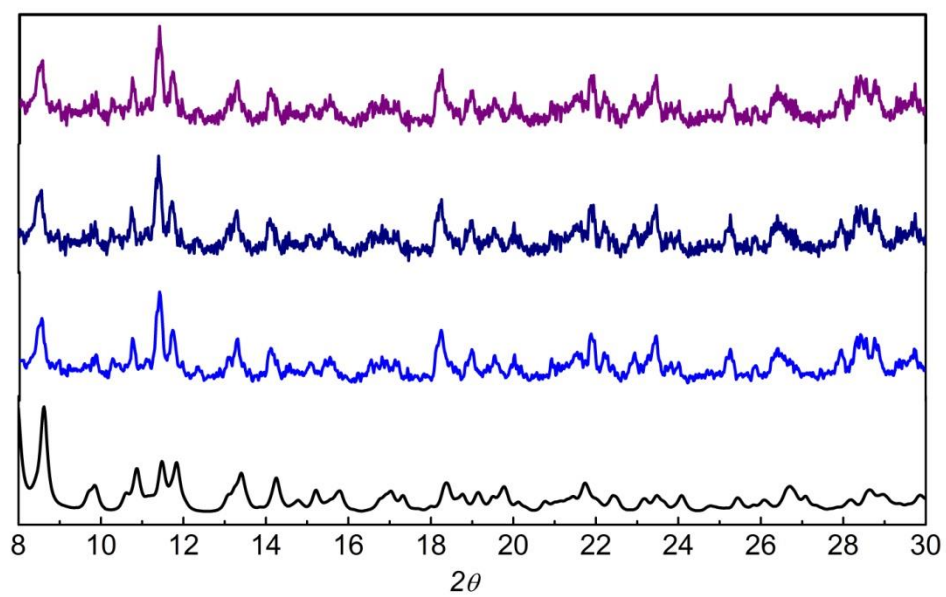

**Figure ESI9.** PXRD of complexes **1-3** (top to bottom) at room temperature. Black: single crystal simulated PXRD.
